# Supplementary material for: Nicotinamide Riboside and Phycocyanin Oligopeptides Affect Stress Susceptibility in Chronic Corticosterone-Exposed Rats
Source: MDPI journal article supplement (doi:10.3390/antiox12101849), 2023-10-12
Supplement: s1 [file s1]

# **Nicotinamide riboside and phycocyanin oligopeptides affect stress susceptibility in chronic corticosterone-exposed rats**

**Cemal Orhan<sup>1</sup>, Emre Sahin<sup>2</sup>, Mehmet Tuzcu<sup>3</sup>, Nurhan Sahin<sup>1</sup>, Abdullah Celik<sup>1</sup>, Sara Perez Ojalvo<sup>4</sup>, Sarah Sylla<sup>4</sup>, James R. Komorowski<sup>4</sup> and Kazim Sahin<sup>1,\*</sup>**

<sup>1</sup>Department of Animal Nutrition, Faculty of Veterinary Medicine, Firat University, Elazig, Turkey

<sup>2</sup>Department of Animal Nutrition, Faculty of Veterinary Medicine, Bingol University, Bingol, Turkey

<sup>3</sup>Department of Biology, Faculty of Science, Firat University, Elazig, Turkey

<sup>4</sup>Research and Development, Nutrition 21, Harrison, NY 10577, USA

\*Corresponding author:

Kazim Sahin, DVM, Ph.D., F.A.C.N. Member of The Turkish Academy of Sciences, Professor of Nutrition Veterinary Faculty Firat University 23119 Elazig, Turkey. Phone: +90-532-7473506, Phone: +904242370000/3938  
Email: nsahinkm@yahoo.com, ksahin@firat.edu.tr

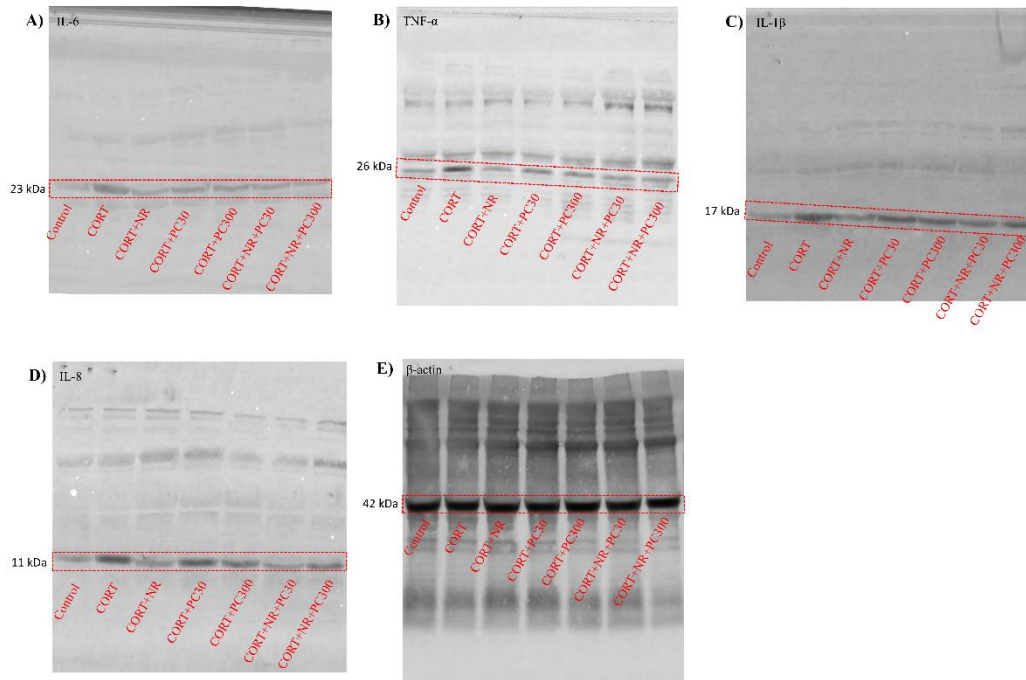

**Figure S1.** Full immunoblots related to Figure 2 [liver IL-6 (A), TNF- $\alpha$  (B), IL-1 $\beta$  (C), IL-8 (D) and (E)  $\beta$ -actin levels]. The densitometric analysis of the relative intensity according to the control group of the western blot bands was performed with  $\beta$ -actin normalization to ensure equal protein loading. How many kDa are shown in each blot's representative. IL-6, interleukin-6; TNF-  $\alpha$ , tumor necrosis factor  $\alpha$ ; IL-1 $\beta$ , interleukin-1 $\beta$ ; IL-8, interleukin-8.

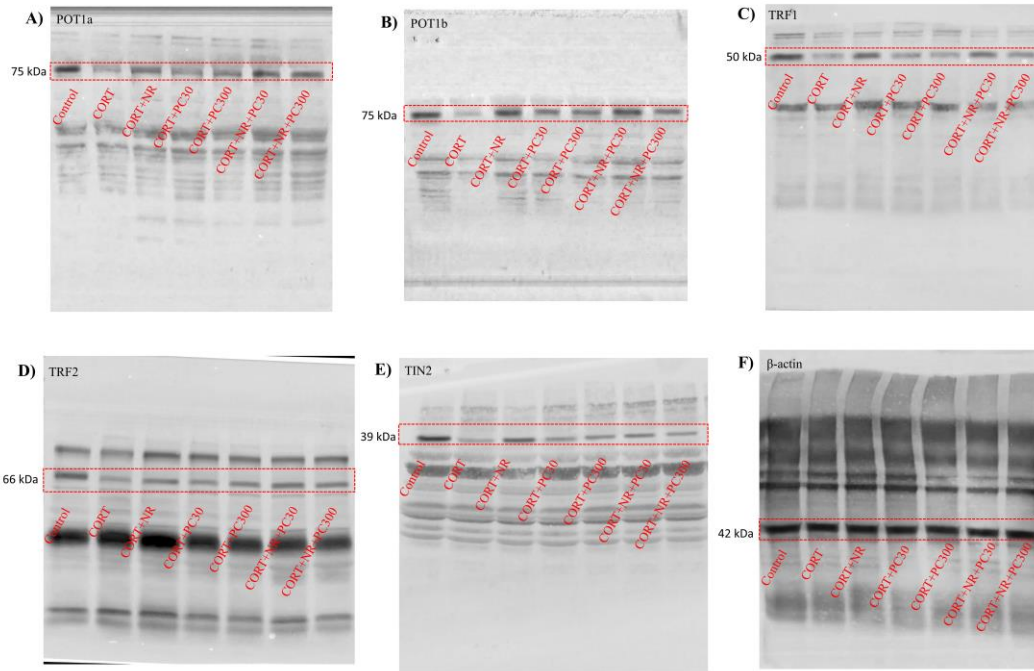

**Figure S2.** Full immunoblots related to Figure 3 [liver POT1a (A), POT1b (B), TRF1 (C), TRF2 (D) TIN2 (E) and  $\beta$ -actin (F) levels]. The densitometric analysis of the relative intensity according to the control group of the western blot bands was performed with  $\beta$ -actin normalization to ensure equal protein loading. How many kDa are shown in each blot's representative. POT1a, protection of telomeres protein 1a; POT1b, protection of telomeres protein 1b; TRF1, telomeric repeat-binding factor 1; TRF2, telomeric repeat-binding factor 1; TIN2, TRF1-interacting protein 2.

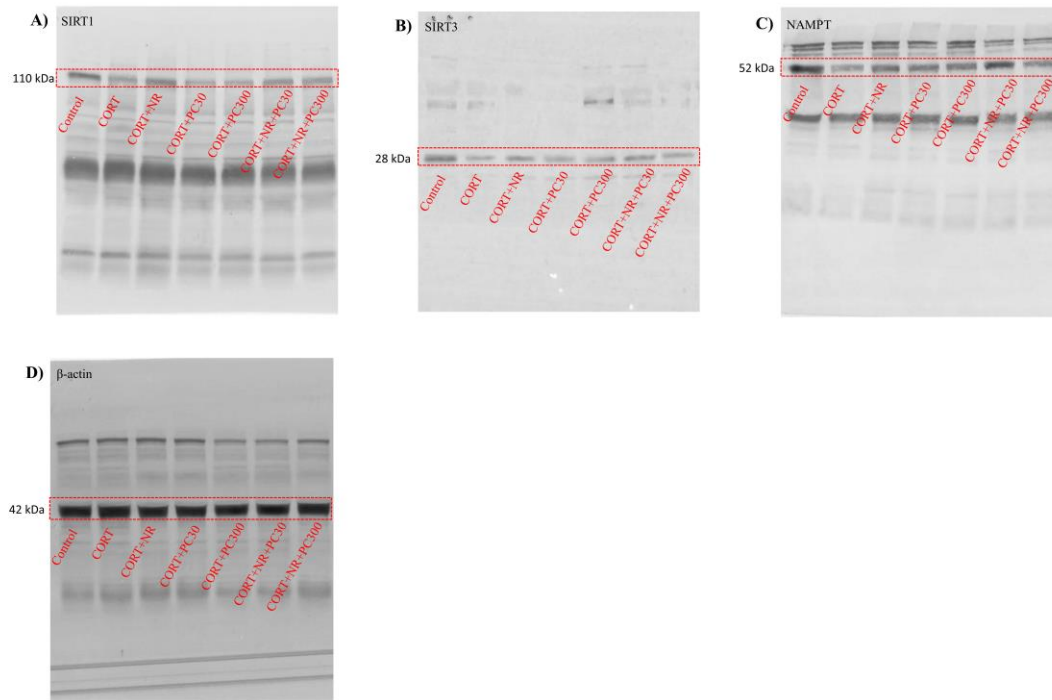

**Figure S3.** Full immunoblots related to Figure 4 [liver SIRT1 (A), SIRT3 (B), NAMPT (C) and  $\beta$ -actin (D) levels]. The densitometric analysis of the relative intensity according to the control group of the western blot bands was performed with  $\beta$ -actin normalization to ensure equal protein loading. How many kDa are shown in each blot's representative. SIRT1, sirtuin 1; SIRT3, sirtuin 3; NAMPT, Nicotinamide phosphoribosyltransferase.
